# Supplementary material for: Titanium complex with an [OSSO]-type bis(phenolate) ligand for ethylene copolymerization with vinyl polar monomer based on group protection
Source: Royal Society of Chemistry journal article supplement (doi:10.1039/c9ra06271h), 2019-01-01
Supplement: c9ra06271h1.pdf [file c9ra06271h1.pdf]

**Supplementary Materials for:**

**Titanium complex with an [OSSO]-type bis(phenolate) ligand for ethylene  
copolymerization with vinyl polar monomer**

*Yuqiong Zhu<sup>1</sup>, Sihan Li<sup>1</sup>, Huaqing Liang<sup>1</sup>, Xiuli Xie<sup>1</sup>, Fangming Zhu<sup>1, 2</sup>*

<sup>1</sup>GDHPPCLab, School of Chemistry, Sun Yat-Sen University, 510275, China

<sup>2</sup>Key Lab for Polymer Composite and Functional Materials of Ministry of Education,  
School of Chemistry, Sun Yat-Sen University, Guangzhou, 510275, China

**Contents**

|                                                          |           |
|----------------------------------------------------------|-----------|
| <b>1. Experimental Procedures.....</b>                   | <b>S2</b> |
| <b>2. Spectra Data.....</b>                              | <b>S2</b> |
| <b>2.1 <sup>1</sup>H NMR and <sup>13</sup>C NMR.....</b> | <b>S3</b> |
| <b>2.2 DSC data.....</b>                                 | <b>S3</b> |
| <b>3. References.....</b>                                | <b>S4</b> |

## Experimental Procedures

**Synthesis of *p*-TBDMSOS.** A 500 mL flask equipped with a magnetic stirrer was charged with 14.46 g (120 mmol) of *p*-hydroxybenzaldehyde and 100 mL of CH<sub>2</sub>Cl<sub>2</sub>. Then 16.8 mL (120 mmol) of trimethylamine was introduced into the suspension solution and stirred until it become clear. Then 100 mL solution of CH<sub>2</sub>Cl<sub>2</sub> containing 18.04 g (120 mmol) *tert*-butyldimethylsilyl was added dropwise into the solution and stirred 2 h at room temperature. The reactant was quenched by adding 100 mL water. The organic phase was separated and washed three times by pure water and brine respectively, dried by anhydrous MgSO<sub>4</sub>, filtered and concentrated to yield yellow oily production, which was regard as *p-tert*-butyldimethylsilyxybenzaldehyde. Yield 26.8 g (95%).<sup>1</sup>

THF (50 mL) was added to dissolve methyltriphenylphosphonium bromide (10.18 g, 28.5 mmol) in a 250 mL flask equipped with a magnetic stirrer. *n*-BuLi (2.5 M solution in hexane, 11.2 mL) in 50 mL THF was introduced dropwise via syringe into the solution above under ice bathe and the mixture was stirred 10 min. A solution of *p-tert*-butyldimethylsilyxybenzaldehyde (7.09 g, 30 mmol) in 50 mL THF was added dropwise with a dropping funnel and then stirred for 4 h after heating up to the room temperature. After the reaction, the reactant was quenched with NH<sub>4</sub>Cl (1.6 g) and filtered to obtain the solution. Then it was purified by concentrating and column chromatography with hexane as the eluent. The final production was a colorless oil with high yield of 5.63 g (90 %).

## Spectra Data

### <sup>1</sup>H NMR and <sup>13</sup>C NMR

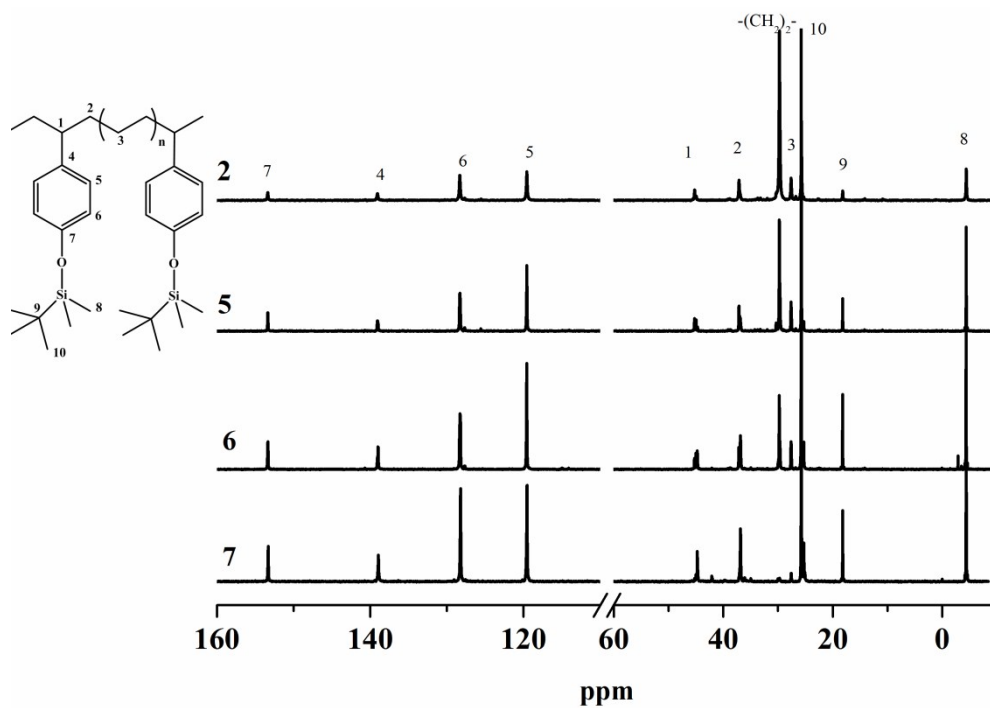

**Fig. 1.** The  $^{13}\text{C}$  NMR spectra of poly(E-co-(*p*-TBDMSOS)) obtained from Runs 2, 5, 6 and 7 in

Table 1.

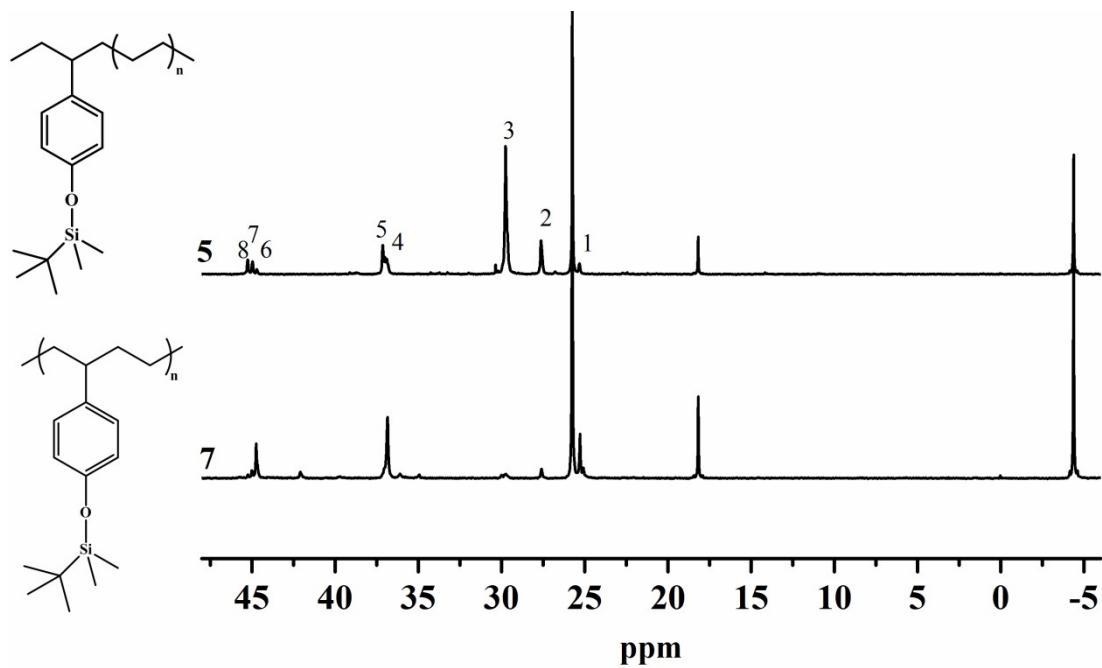

**Fig. 2.** Aliphatic regions of  $^{13}\text{C}$  NMR spectra of poly(E-co-(*p*-TBDMSOS))

**Table 1.** The  $^{13}\text{C}$  NMR chemical shift of poly(E-co-(*p*-TBDMSOS)) in Fig. 2

| Carbon                                                                                 | Chemical Shift (ppm) | Sequence       |
|----------------------------------------------------------------------------------------|----------------------|----------------|
| 1( $\text{S}_{\beta\beta}$ )                                                           | 25.3                 | SES            |
| 2( $\text{S}_{\beta\delta}$ )                                                          | 27.6                 | SEES, SEE      |
| 3( $\text{S}_{\gamma\gamma}$ , $\text{S}_{\delta\delta}$ , $\text{S}_{\gamma\delta}$ ) | 29.7                 | SEES, EEE, SEE |
| 4( $\text{S}_{\alpha\gamma}$ )                                                         | 36.9                 | SES            |
| 5( $\text{S}_{\alpha\delta}$ )                                                         | 37.1                 | SEES           |
| 6( $\text{T}_{\delta\delta}$ )                                                         | 44.7                 | SES            |
| 7( $\text{T}_{\delta\delta}$ )                                                         | 45.0                 | SEES           |
| 8( $\text{T}_{\delta\delta}$ )                                                         | 45.2                 | SEE            |

### DSC and GPC data

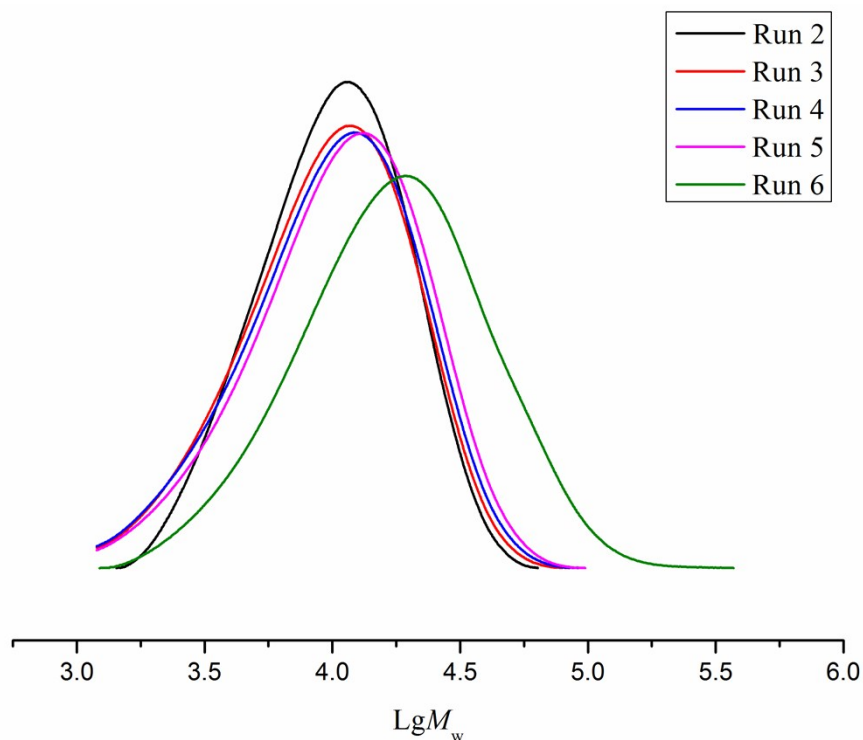

**Fig. 3.** GPC curves for copolymerization of E/*p*-TBDMSOS of Runs 2, 3, 4, 5 and 6.

### 3. References

- (1) Kim, Y.; Do, Y. Preparation of Syndiotactic Poly(4-*tert*-butyldimethylsilyloxystyrene) and

Poly(4-hydroxystyrene). *Macromol. Rapid Commun.* **2000**, 21, 1148–1155.
